# Supplementary material
Source: publisher site journal article supplement (https://cdn.jamanetwork.com/ama/content_public/journal/cardiology/936036/hoi160083supp1_prod.pdf)

## Supplemental Material

Pandey A, Golwala H, Sheng S, et al. Factors associated with and prognostic implications of cardiac troponin elevation in decompensated heart failure with preserved ejection fraction: findings from the American Heart Association Get With The Guidelines–Heart Failure program. *JAMA Cardiol*. Published online December 28, 2016.

doi: 10.1001/jamacardio.2016.4726

**eMethods.** Candidate factors for adjustment in the logistic regression model evaluating the significant clinical factors associated with abnormal troponin elevation

**eTable 1.** Comparison of baseline demographic, clinical characteristics and in-hospital outcomes among HFpEF patients with vs. without troponin assessment during the study period

**eTable 2.** Baseline characteristics of study participants with available Troponin-I levels measurements according to quartiles of Troponin-I

**eTable 3.** Adjusted association between troponin levels and length of stay measured as a continuous variable

**eTable 4.** Association between presence of elevated troponin levels with outcomes among participants without a history of myocardial infarction or coronary revascularization

**eTable 5.** Clinical characteristics, in-hospital management, and in-hospital outcomes among patients with heart failure with reduced ejection fraction stratified by the troponin levels (normal vs. abnormal)

**eFigure 1.** Derivation of the study cohort. HFpEF: Heart failure with preserved ejection Fraction, LVEF: Left ventricular ejection fraction

**eFigure 2.** Adherence to GWTG-HF process of care measure applicable to patients with Heart Failure and preserved ejection fraction among study participants stratified by baseline troponin levels (normal vs. abnormal). BP: Blood pressure, HFpEF: Heart failure with preserved ejection fraction

This supplementary material has been provided by the authors to give readers additional information about their work.

**eMethods:** Candidate factors for adjustment in the logistic regression model evaluating the significant clinical factors associated with abnormal troponin elevation:

- Demographics: age (linear spline with knot at 70) , sex, race, smoking, BMI
- Medical history: CAD, diabetes, hypertension, ischemic history (history of MI, CAD, PCI, CABG or prior PCI/CABG undetermined)
- Exams/labs at admission: BNP level, systolic blood pressure(linear splines with knot at 150), heart rate, creatinine, QRS duration in EKG (linear splines with knot at 120)

**eTable 1:** Comparison of baseline demographic, clinical characteristics and in-hospital outcomes among HFpEF patients with vs. without troponin assessment during the study period

| <b>Participant Characteristics</b>                                                                                                                                                                                  | <b>HFpEF patients with troponin assessment (N = 34,233)</b> | <b>HFpEF patients without troponin assessment (N = 62,536)</b> | <b>Absolute standardized difference</b> |
|---------------------------------------------------------------------------------------------------------------------------------------------------------------------------------------------------------------------|-------------------------------------------------------------|----------------------------------------------------------------|-----------------------------------------|
| <b>Demographic Characteristics</b>                                                                                                                                                                                  |                                                             |                                                                |                                         |
| Age, years                                                                                                                                                                                                          | 79 (68 – 86)                                                | 79 (68 – 86)                                                   | 1.82                                    |
| Women                                                                                                                                                                                                               | 66.6                                                        | 63.9                                                           | 5.62                                    |
| Blacks                                                                                                                                                                                                              | 12.2                                                        | 13.8                                                           | 4.83                                    |
| <b>Medical History</b>                                                                                                                                                                                              |                                                             |                                                                |                                         |
| Coronary artery disease                                                                                                                                                                                             | 44.4                                                        | 42.6                                                           | 3.74                                    |
| Diabetes                                                                                                                                                                                                            | 44.1                                                        | 41.2                                                           | 5.83                                    |
| Hypertension                                                                                                                                                                                                        | 85.3                                                        | 79.5                                                           | 15.5                                    |
| Prior Myocardial infarction                                                                                                                                                                                         | 15.2                                                        | 12.8                                                           | 7.11                                    |
| <b>Presentation Characteristics</b>                                                                                                                                                                                 |                                                             |                                                                |                                         |
| Systolic Blood Pressure                                                                                                                                                                                             | 145 (126 – 166)                                             | 142 (124 – 163)                                                | 7.51                                    |
| Heart Rate                                                                                                                                                                                                          | 81 (70 – 95)                                                | 80 (69 – 93)                                                   | 7.41                                    |
| BNP levels                                                                                                                                                                                                          | 519 (265 – 944)                                             | 447 (224 – 864)                                                | 10.75                                   |
| EGFR on admission                                                                                                                                                                                                   | 53.9 (40.3 – 73.5)                                          | 54.3 (40.3 – 74.4)                                             | 1.62                                    |
| <b>In-Hospital Management &amp; Procedures</b>                                                                                                                                                                      |                                                             |                                                                |                                         |
| Mechanical Ventilation                                                                                                                                                                                              | 3.36                                                        | 2.14                                                           | 7.45                                    |
| Right Heart Cath                                                                                                                                                                                                    | 1.73                                                        | 2.34                                                           | 4.34                                    |
| Vasodilator use                                                                                                                                                                                                     | 9.83                                                        | 5.22                                                           | 17.6                                    |
| <b>In-hospital Outcomes</b>                                                                                                                                                                                         |                                                             |                                                                |                                         |
| In-hospital mortality                                                                                                                                                                                               | 2.32                                                        | 2.46                                                           | 0.95                                    |
| Length of stay (days)                                                                                                                                                                                               | 4 (3 - 6)                                                   | 4 (3 - 6)                                                      | 1.68                                    |
| Discharge home (yes)                                                                                                                                                                                                | 70.52                                                       | 71.42                                                          | 1.99                                    |
| Data presented as median & interquartile range or %. EGFR: Estimated glomerular filtration rate; BNP: Brain natriuretic peptide<br>Absolute standardized differences greater than 10 were considered as significant |                                                             |                                                                |                                         |

**eTable 2:** Baseline characteristics of study participants with available Troponin-I levels measurements according to quartiles of Troponin-I

|                         | Troponin-I<br>Quartile 1 | Troponin-I<br>Quartile 2 | Troponin-I<br>Quartile 3 | Troponin-I<br>Quartile 4 | P-value |
|-------------------------|--------------------------|--------------------------|--------------------------|--------------------------|---------|
| Age                     | 76<br>(65 – 85)          | 78<br>(67 – 86)          | 80<br>(69 – 87)          | 81<br>(71 – 87)          | <0.0001 |
| Women                   | 68.99                    | 66.91                    | 65.41                    | 65.71                    | 0.0002  |
| Ethnicity               |                          |                          |                          |                          |         |
| Whites                  | 75.60                    | 75.16                    | 76.50                    | 77.90                    | <0.0001 |
| Blacks                  | 9.83                     | 12.21                    | 12.73                    | 10.81                    |         |
| Hispanics               | 11.16                    | 7.75                     | 6.98                     | 7.58                     |         |
| Asian                   | 1.05                     | 1.44                     | 1.40                     | 1.35                     |         |
| Coronary artery disease | 41.06                    | 42.33                    | 46.14                    | 47.30                    | <.0001  |
| Hypertension            | 86.10                    | 85.04                    | 84.57                    | 85.60                    | 0.1011  |
| Diabetes                | 45.88                    | 45.45                    | 43.85                    | 41.32                    | < .0001 |
| Renal Insufficiency     | 7.92                     | 9.62                     | 13.25                    | 10.19                    | < .0001 |
| Smoking                 | 12.98                    | 12.34                    | 11.77                    | 12.19                    | 0.2793  |
| Previous MI             | 13.19                    | 13.69                    | 15.33                    | 17.70                    | < .0001 |
| BMI                     | 30.02<br>(25.4 – 38.0)   | 29.38<br>(24.9 – 36.6)   | 28.90<br>(24.2 – 34.9)   | 28.65<br>(23.7 – 33.5)   | < .0001 |
| Systolic BP             | 144.00<br>(126 – 163)    | 146.00<br>(127 – 166)    | 145.00<br>(126 – 165)    | 144.00<br>(124 – 168)    | 0.008   |
| BNP                     | 387.00<br>(193 – 708)    | 486.00<br>(267 – 819)    | 593.00<br>(331 -1040)    | 685.00<br>(386 – 1220)   | < .0001 |
| LVEF                    | 60<br>(55 – 64)          | 60<br>(55 – 63)          | 58<br>(55 – 63)          | 58<br>(55 – 63)          |         |
| QRS on admission        | 93.00<br>(84 – 110)      | 94.00<br>(84 – 116)      | 96.00<br>(85 –124)       | 97.00<br>(86 – 124)      | < .0001 |
| EGFR                    | 59.13<br>(43.9 – 79.6)   | 55.07<br>(41.2 – 74.7)   | 51.19<br>(38.8 – 68.1)   | 49.78<br>(37.9 – 66.8)   | < .0001 |

Data presented as median & interquartile range or %  
 BP: Blood pressure; BNP: Brain Natriuretic Peptide; BMI: Body mass index; EGFR: Estimated glomerular filtration rate; MI: Myocardial infarction; LVEF: Left ventricular ejection fraction

**eTable 3:** Adjusted association between troponin levels and length of stay measured as a continuous variable

|                                                                                                                                                                                                                                                                                                                                                                                                                                                                                                                                                                                                                                                                                                                                       | <b>Adjusted Parameter estimate (95%CI)</b> |
|---------------------------------------------------------------------------------------------------------------------------------------------------------------------------------------------------------------------------------------------------------------------------------------------------------------------------------------------------------------------------------------------------------------------------------------------------------------------------------------------------------------------------------------------------------------------------------------------------------------------------------------------------------------------------------------------------------------------------------------|--------------------------------------------|
| <b><i>Troponin (T or I) Categories</i></b>                                                                                                                                                                                                                                                                                                                                                                                                                                                                                                                                                                                                                                                                                            |                                            |
| Elevated vs. normal                                                                                                                                                                                                                                                                                                                                                                                                                                                                                                                                                                                                                                                                                                                   | 0.56 (0.43 – 0.70)                         |
| P-value                                                                                                                                                                                                                                                                                                                                                                                                                                                                                                                                                                                                                                                                                                                               | < .0001                                    |
| <b><i>Troponin I Quartiles</i></b>                                                                                                                                                                                                                                                                                                                                                                                                                                                                                                                                                                                                                                                                                                    |                                            |
| Q 2 vs. Q1                                                                                                                                                                                                                                                                                                                                                                                                                                                                                                                                                                                                                                                                                                                            | 0.28 (0.12 – 0.43)                         |
| Q 3 vs. Q1                                                                                                                                                                                                                                                                                                                                                                                                                                                                                                                                                                                                                                                                                                                            | 0.48 (0.33 – 0.64)                         |
| Q 4 vs. Q1                                                                                                                                                                                                                                                                                                                                                                                                                                                                                                                                                                                                                                                                                                                            | 0.76 (0.60 – 0.93)                         |
| P-value                                                                                                                                                                                                                                                                                                                                                                                                                                                                                                                                                                                                                                                                                                                               | < .0001                                    |
| <b><i>Troponin-T Quartiles</i></b>                                                                                                                                                                                                                                                                                                                                                                                                                                                                                                                                                                                                                                                                                                    |                                            |
| Q 2 vs. Q1                                                                                                                                                                                                                                                                                                                                                                                                                                                                                                                                                                                                                                                                                                                            | 0.50 (0.16 – 0.84)                         |
| Q 3 vs. Q1                                                                                                                                                                                                                                                                                                                                                                                                                                                                                                                                                                                                                                                                                                                            | 0.55 (0.32 – 0.78)                         |
| Q 4 vs. Q1                                                                                                                                                                                                                                                                                                                                                                                                                                                                                                                                                                                                                                                                                                                            | 0.95 (0.51 – 1.39)                         |
| P-value                                                                                                                                                                                                                                                                                                                                                                                                                                                                                                                                                                                                                                                                                                                               | < .0001                                    |
| <p>Adjusted multivariable linear regression models were constructed with generalized estimating equations to account for in-hospital clustering is performed to examine associations of troponin elevation for each outcome.</p> <p>Factors for adjustment included year, demographic characteristics (age, sex, race, insurance status, cigarette smoking in the past year), medical history (systolic blood pressure on admission, anemia, ischemic heart disease, diabetes, hyperlipidemia, hypertension, atrial fibrillation), estimated glomerular filtration rate at presentation, BNP levels at presentation, and hospital characteristics: region, hospital type, number of beds, rural versus urban)</p> <p>Q: Quartiles</p> |                                            |

**eTable 4:** Association between presence of elevated troponin levels with outcomes among participants without a history of myocardial infarction or coronary revascularization

|                                                                                                                                                                                                                                                                                                                                                                                                                                                                                                                                                                                                                                                                                                                                                                                                                                                                                                                                                                                                                                                      | <b>Multivariable adjusted Odds Ratio (95% CI)</b> |                                            |                        |
|------------------------------------------------------------------------------------------------------------------------------------------------------------------------------------------------------------------------------------------------------------------------------------------------------------------------------------------------------------------------------------------------------------------------------------------------------------------------------------------------------------------------------------------------------------------------------------------------------------------------------------------------------------------------------------------------------------------------------------------------------------------------------------------------------------------------------------------------------------------------------------------------------------------------------------------------------------------------------------------------------------------------------------------------------|---------------------------------------------------|--------------------------------------------|------------------------|
|                                                                                                                                                                                                                                                                                                                                                                                                                                                                                                                                                                                                                                                                                                                                                                                                                                                                                                                                                                                                                                                      | <b>In-hospital mortality</b>                      | <b>Length of Stay (&gt; 4 vs. ≤4 days)</b> | <b>Discharge home*</b> |
| <b><i>Troponin (T or I) Categories</i></b>                                                                                                                                                                                                                                                                                                                                                                                                                                                                                                                                                                                                                                                                                                                                                                                                                                                                                                                                                                                                           |                                                   |                                            |                        |
| Elevated vs. normal                                                                                                                                                                                                                                                                                                                                                                                                                                                                                                                                                                                                                                                                                                                                                                                                                                                                                                                                                                                                                                  | 2.46<br>(2.07 – 2.91)                             | 1.32<br>(1.21 – 1.42)                      | 0.64<br>(0.59 - 0.69)  |
| P-value                                                                                                                                                                                                                                                                                                                                                                                                                                                                                                                                                                                                                                                                                                                                                                                                                                                                                                                                                                                                                                              | < .0001                                           | < .0001                                    | < .0001                |
| <b><i>Troponin I Quartiles</i></b>                                                                                                                                                                                                                                                                                                                                                                                                                                                                                                                                                                                                                                                                                                                                                                                                                                                                                                                                                                                                                   |                                                   |                                            |                        |
| Q 2 vs. Q1                                                                                                                                                                                                                                                                                                                                                                                                                                                                                                                                                                                                                                                                                                                                                                                                                                                                                                                                                                                                                                           | 1.61<br>(1.01- 2.54)                              | 1.20<br>(1.07- 1.35)                       | 0.80<br>(0.71- 0.89)   |
| Q 3 vs. Q1                                                                                                                                                                                                                                                                                                                                                                                                                                                                                                                                                                                                                                                                                                                                                                                                                                                                                                                                                                                                                                           | 2.31<br>(1.46 - 3.67)                             | 1.29<br>(1.14 - 1.45)                      | 0.65<br>(0.57 - 0.73)  |
| Q 4 vs. Q1                                                                                                                                                                                                                                                                                                                                                                                                                                                                                                                                                                                                                                                                                                                                                                                                                                                                                                                                                                                                                                           | 3.88<br>(2.55 - 5.91)                             | 1.54<br>(1.38 - 1.71)                      | 0.52<br>(0.46 - 0.6)   |
| P-value                                                                                                                                                                                                                                                                                                                                                                                                                                                                                                                                                                                                                                                                                                                                                                                                                                                                                                                                                                                                                                              | < .0001                                           | < .0001                                    | < .0001                |
| <p>Adjusted multivariable logistic (for categorical outcomes) or linear (for continuous outcomes) regression models were constructed with generalized estimating equations to account for in-hospital clustering is performed to examine associations of troponin elevation for each outcome.</p> <p>Adjusted multivariable logistic regression model with generalized estimating equations to account for in-hospital clustering is performed to examine associations of troponin elevation for each outcome.</p> <p>Factors for adjustment included year, demographic characteristics (age, sex, race, insurance status, cigarette smoking in the past year), medical history (systolic blood pressure on admission, anemia, ischemic heart disease, diabetes, hyperlipidemia, hypertension, atrial fibrillation), hospital characteristics: region, hospital type, number of beds, rural versus urban)</p> <p>*Defined as discharged to 'home' vs 'hospice-home', 'hospice-health care facility', 'other health care facility' and 'expired'.</p> |                                                   |                                            |                        |

**eTable 5:** Clinical characteristics, in-hospital management, and in-hospital outcomes among patients with heart failure with reduced ejection fraction stratified by the troponin levels (normal vs. abnormal)

| <b>Participant Characteristics</b>                                                                                                                                                                                                                           | <b>Elevated Troponin<br/>(N = 12,325)</b> | <b>Normal Troponin<br/>(N = 23,938)</b> | <b>Absolute Standardized difference</b> |
|--------------------------------------------------------------------------------------------------------------------------------------------------------------------------------------------------------------------------------------------------------------|-------------------------------------------|-----------------------------------------|-----------------------------------------|
| Troponin Level (ng/ml)                                                                                                                                                                                                                                       |                                           |                                         |                                         |
| Tn-I                                                                                                                                                                                                                                                         | 0.12 (0.06 – 0.32)                        | 0.04 (0.02 – 0.07)                      | 25.35                                   |
| Tn-T                                                                                                                                                                                                                                                         | 0.08 (0.05 – 0.20)                        | 0.02 (0.01 – 0.03)                      | 4.00                                    |
| <b><i>Demographic Characteristics</i></b>                                                                                                                                                                                                                    |                                           |                                         |                                         |
| Age, years                                                                                                                                                                                                                                                   | 71 (58 – 82)                              | 70 (57 – 81)                            | 7.33                                    |
| Women                                                                                                                                                                                                                                                        | 36.0                                      | 39.7                                    | 7.75                                    |
| <b><i>Medical History</i></b>                                                                                                                                                                                                                                |                                           |                                         |                                         |
| Coronary artery disease                                                                                                                                                                                                                                      | 53.0                                      | 52.0                                    | 2.05                                    |
| Diabetes                                                                                                                                                                                                                                                     | 41.1                                      | 41.5                                    | 0.84                                    |
| Hypertension                                                                                                                                                                                                                                                 | 79.9                                      | 78.1                                    | 4.40                                    |
| Prior Myocardial infarction                                                                                                                                                                                                                                  | 29.7                                      | 26.1                                    | 8.11                                    |
| <b><i>In-hospital procedures</i></b>                                                                                                                                                                                                                         |                                           |                                         |                                         |
| CABG                                                                                                                                                                                                                                                         | 0.92                                      | 0.41                                    | 6.18                                    |
| PCI                                                                                                                                                                                                                                                          | 0.58                                      | 0.36                                    | 3.20                                    |
| Right heart Cath                                                                                                                                                                                                                                             | 4.53                                      | 4.25                                    | 1.55                                    |
| Mechanical Ventilation                                                                                                                                                                                                                                       | 5.47                                      | 2.77                                    | 14.24                                   |
| <b><i>In-hospital outcomes</i></b>                                                                                                                                                                                                                           |                                           |                                         |                                         |
| In-hospital mortality                                                                                                                                                                                                                                        | 3.45                                      | 1.58                                    | 12.01                                   |
| Length of stay                                                                                                                                                                                                                                               | 4 (3 – 7)                                 | 4 (3 – 6)                               | 6.83                                    |
| Discharge home                                                                                                                                                                                                                                               | 75.9                                      | 82.2                                    | 15.36                                   |
| Data presented as median & interquartile range or %. EGFR: Estimated glomerular filtration rate; ACEi/ARB: Angiotensin converting enzyme inhibitor/Angiotensin receptor blocker; CABG: coronary artery bypass graft; PCI: Percutaneous coronary intervention |                                           |                                         |                                         |

**eFigure 1:** Derivation of the study cohort. HFpEF: Heart failure with preserved ejection Fraction, LVEF: Left ventricular ejection fraction

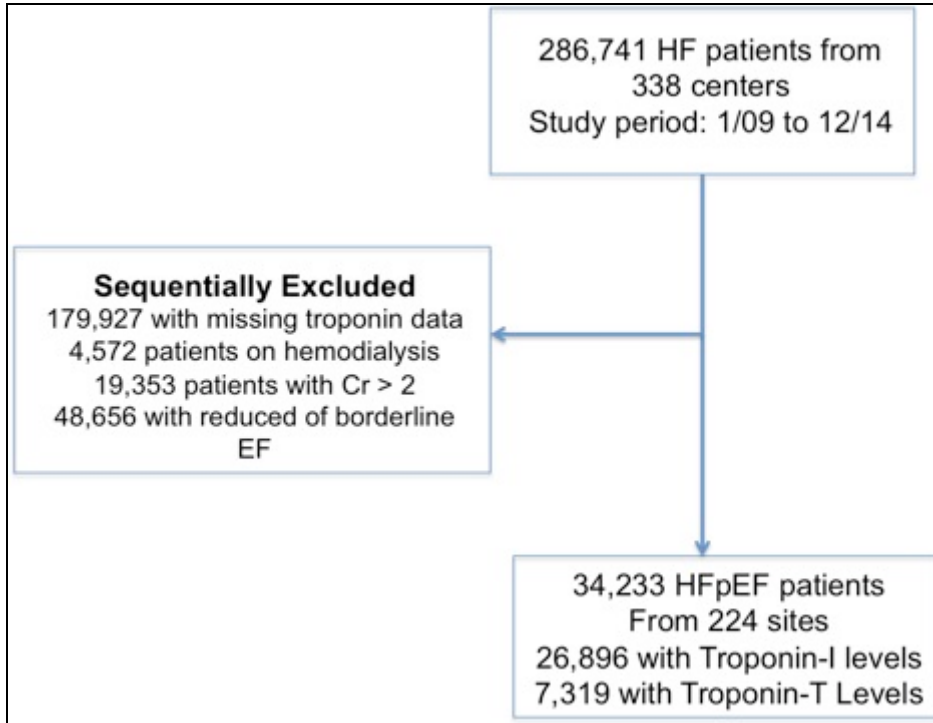



**eFigure 2:** Adherence to GWTG-HF process of care measure applicable to patients with Heart Failure and preserved ejection fraction among study participants stratified by baseline troponin levels (normal vs. abnormal). BP: Blood pressure, HFpEF: Heart failure with preserved ejection fraction

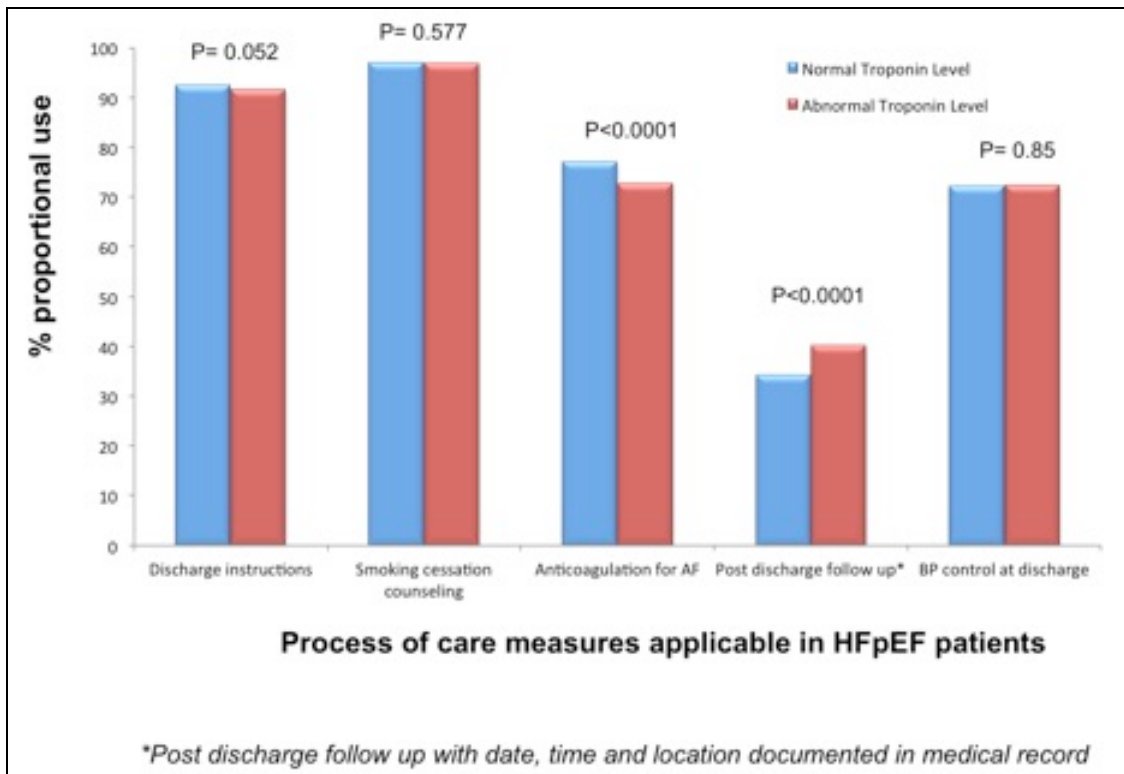

Supplement: Supplementary file 1 [file hoi160083supp1_prod.pdf]
